# Supplementary material for: Procyanidin A2, a polyphenolic compound, exerts anti-inflammatory and anti-oxidative activity in lipopolysaccharide-stimulated RAW264.7 cells
Source: PubMed Central journal article supplement (PMC7406031; doi:10.1371/journal.pone.0237017), 2020-08-05

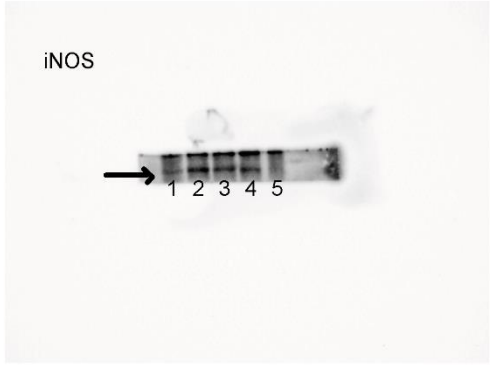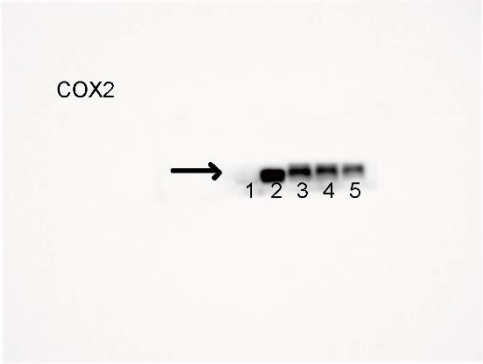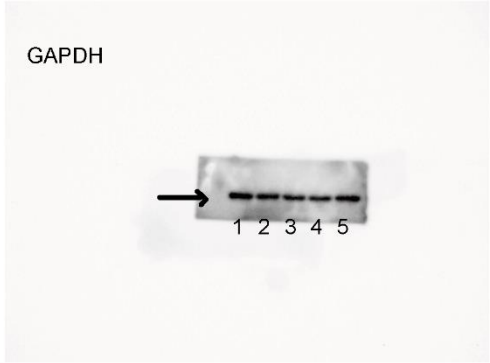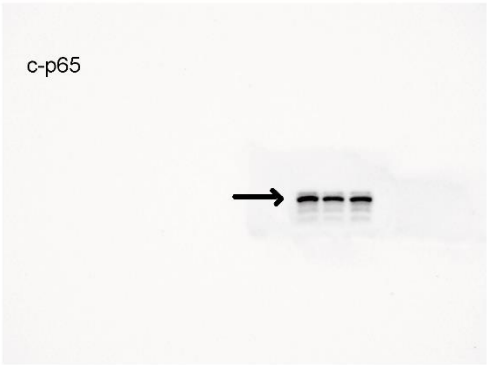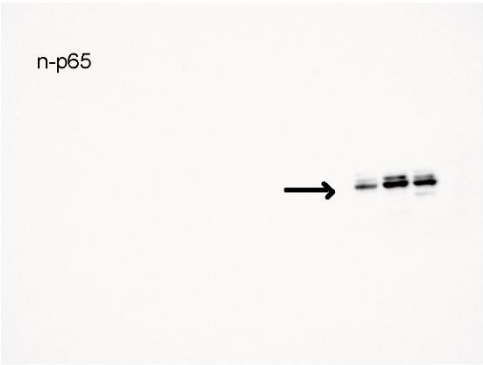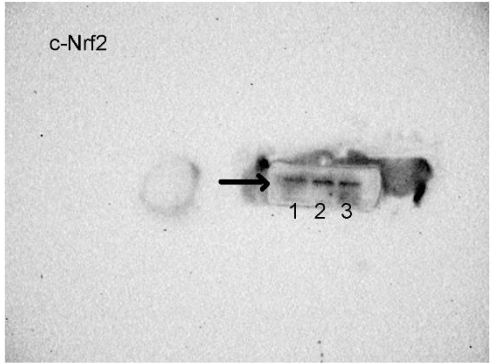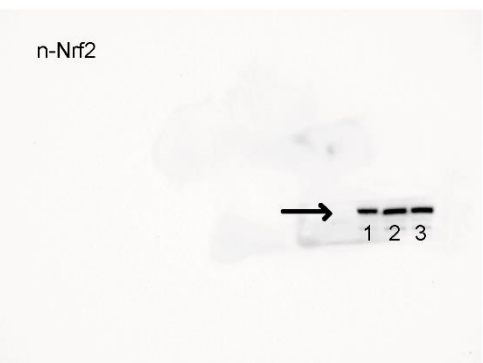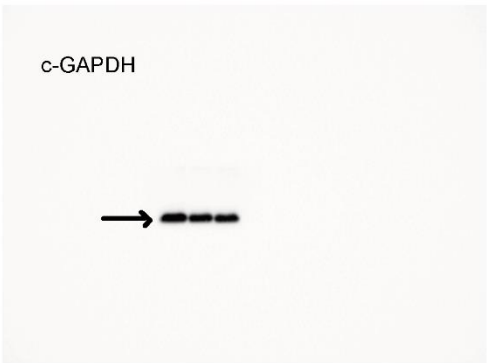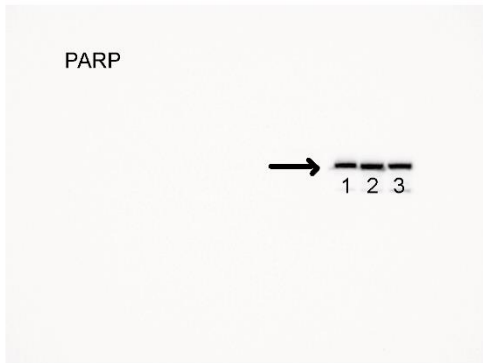

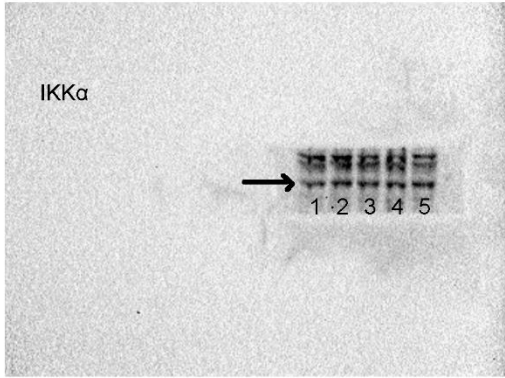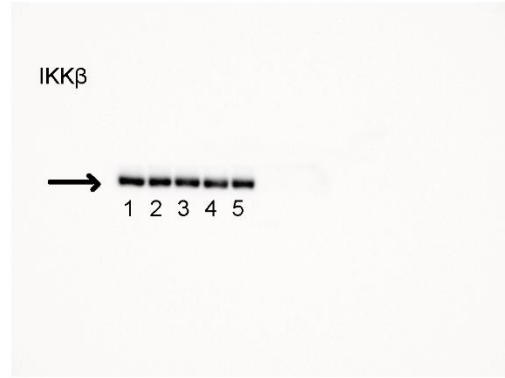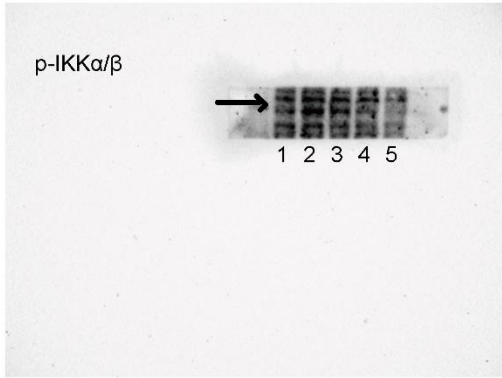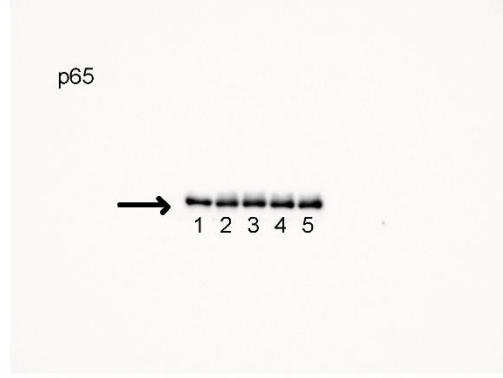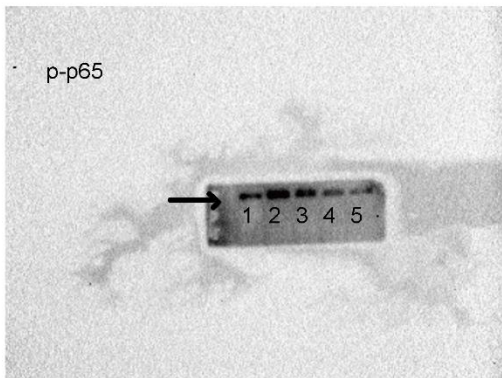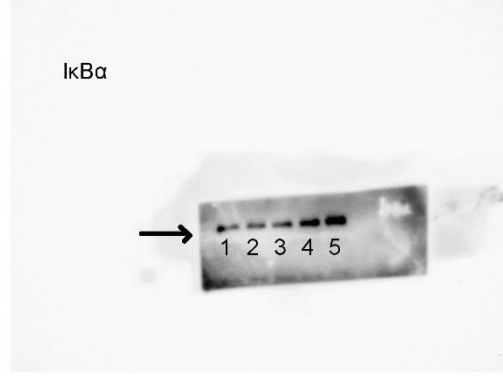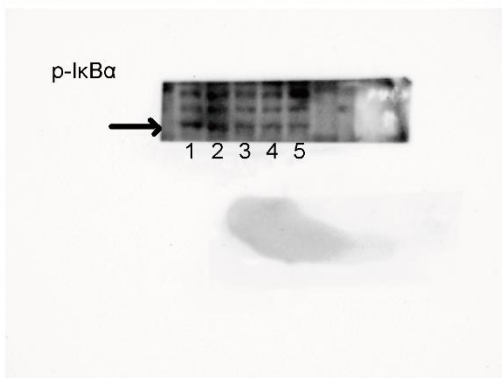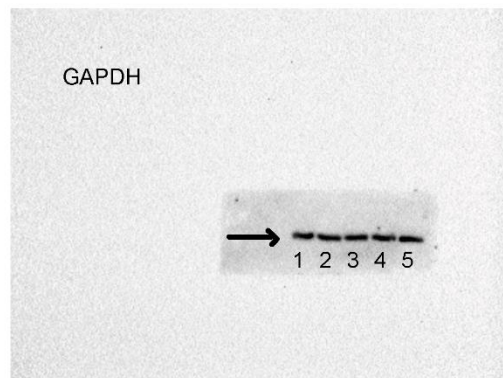

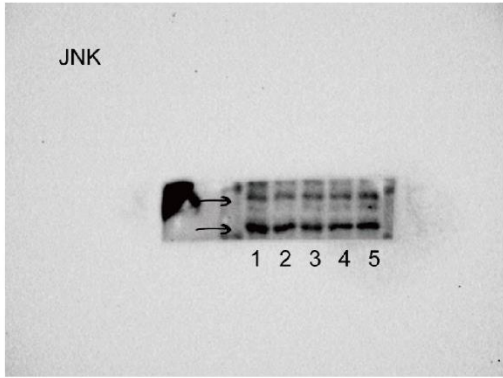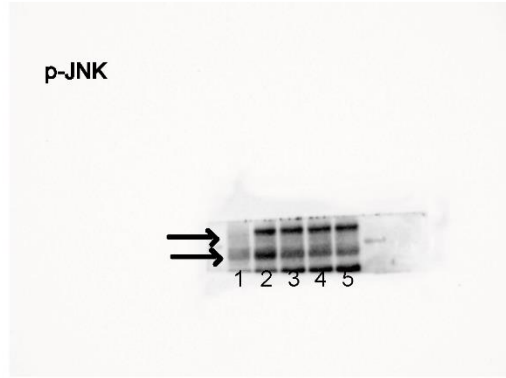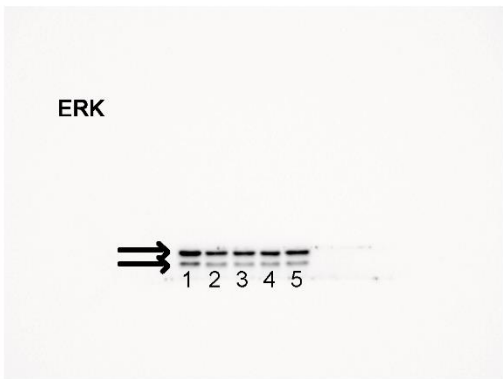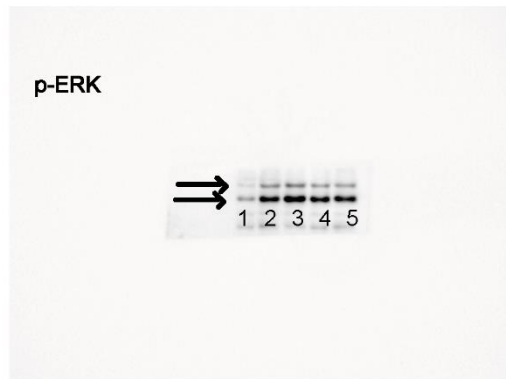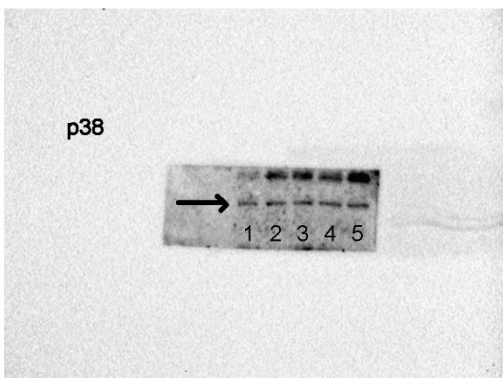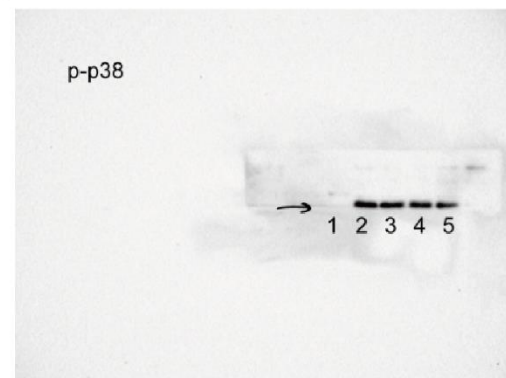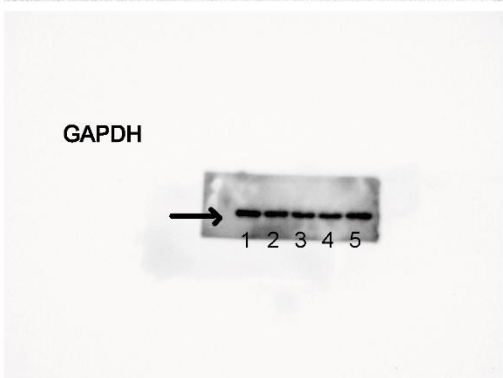

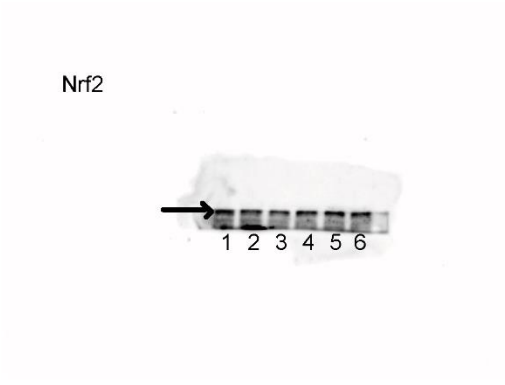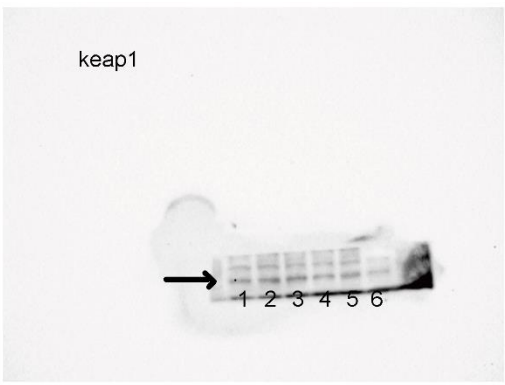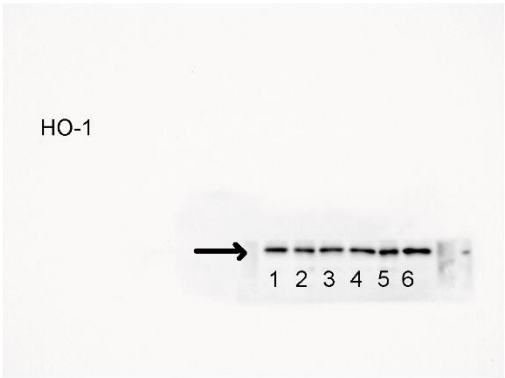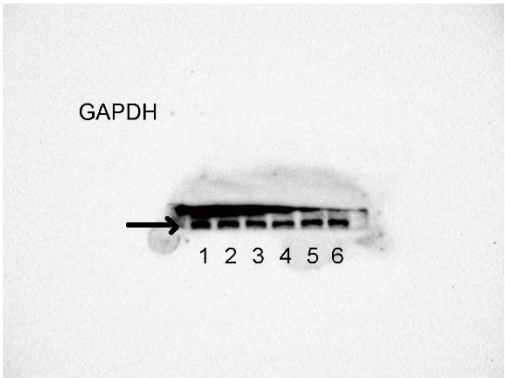

Supplement: pone.0237017.s002.pdf [file pone.0237017.s002.pdf]
